# Supplementary material
Source: Elsevier journal article supplement (http://raiithold.iith.ac.in/466/1/mmc1.pdf)
Supplement: mmc1 [file mmc1.pdf]

## Supporting Information

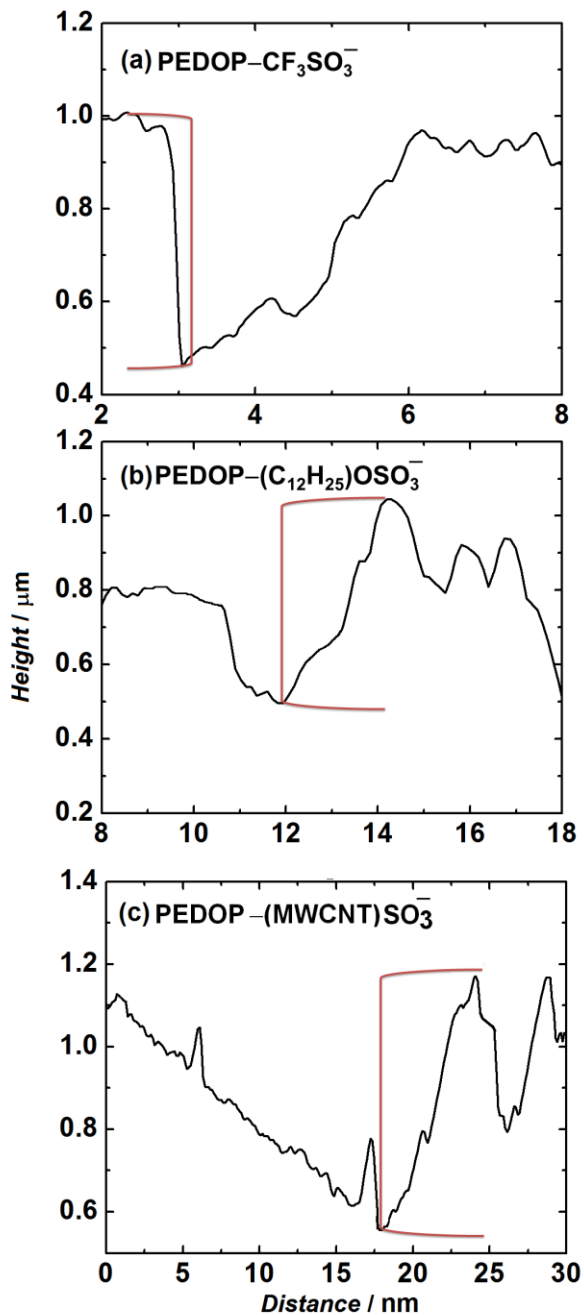

Figure S1 Section profiles of (a) PEDOP- $\text{CF}_3\text{SO}_3^-$ , (b) PEDOP- $(\text{C}_{12}\text{H}_{25})\text{OSO}_3^-$  and (c) PEDOP- $(\text{MWCNT})\text{SO}_3^-$  films obtained from AFM. The vertical span enclosed in a half-bracket in each sample is the thickness of the film: 550, 570 and 620 nm for (a) PEDOP- $\text{CF}_3\text{SO}_3^-$ , (b) PEDOP- $(\text{C}_{12}\text{H}_{25})\text{OSO}_3^-$  and (c) PEDOP- $(\text{MWCNT})\text{SO}_3^-$  films respectively.

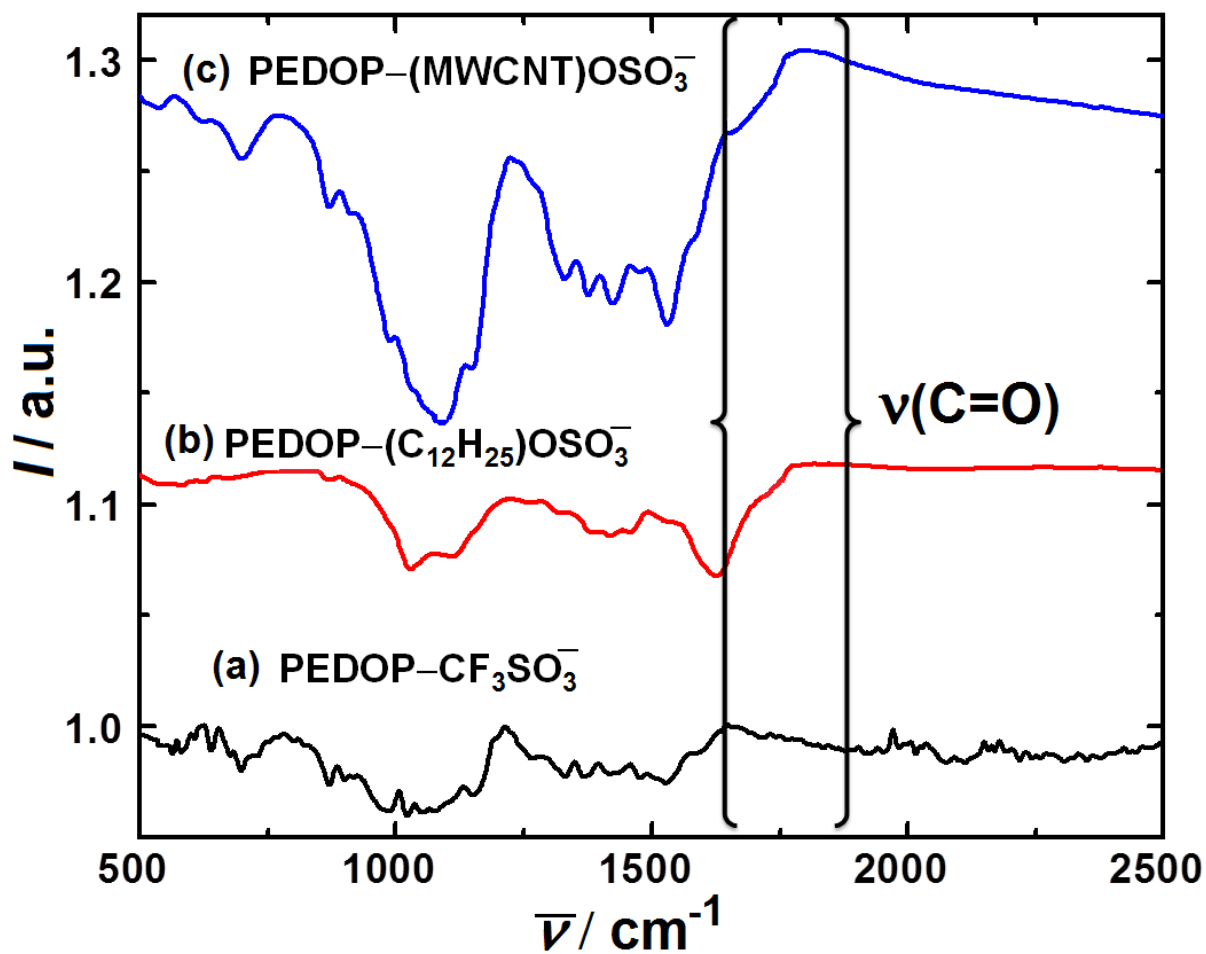

Figure S2 FTIR spectra of as-fabricated (a) PEDOP- $\text{CF}_3\text{SO}_3^-$ , (b) PEDOP- $(\text{C}_{12}\text{H}_{25})\text{OSO}_3^-$  and (c) PEDOP- $(\text{MWCNT})\text{SO}_3^-$  films recorded in the 500 to 2500  $\text{cm}^{-1}$  region. The wavelength range of 1690 to 1900  $\text{cm}^{-1}$ , enclosed in the curly bracket shows no peaks corresponding to  $\nu(\text{C}=\text{O})$  stretching frequency, indicating that all the three films are not over-oxidized during deposition.

The PEDOP-(MWCNT)SO<sub>3</sub><sup>-</sup> film shows Mott-Gurney dependence (bottom inset of Figure 5i), According to the Mott-Gurney Law,

$$j = 9/8 (\epsilon_r \epsilon_0 \mu_{eff} V^2 / L^3) \quad (1)$$

where  $\epsilon_r$  is the dielectric constant of the film,  $\mu_{eff}$  is the carrier mobility,  $\epsilon_0$  is the permittivity of vacuum and  $L$  is the film thickness.

Equation (1) can be rewritten as:

$$\text{Log } j = \log (9/8 \epsilon_r \epsilon_0 \mu_{eff} / L^3) + 2 \log V \quad (2)$$

The y-axis intercept of the inset of Figure 5i can equated to the first part of equation (2) and  $\mu_{eff}$  which is the carrier mobility can be determined.

However, in the equation (2),  $\epsilon_r$  is unknown, and it was determined by recording an impedance spectrum of the same film using two gold coated spring contacts by applying an ac amplitude of 10 mV over a frequency range of 1MHz to 0.01 Hz. No dc bias was applied to the assembly, during the measurement. By equating equations (3) and (4),  $\epsilon_r$  was determined.

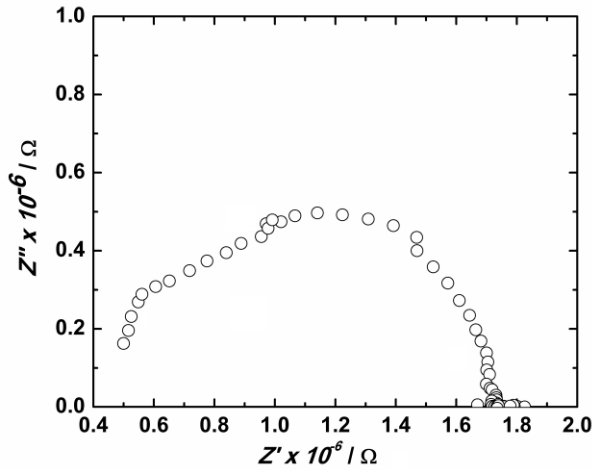

Figure S3 Nyquist plot of PEDOP-(MWCNT)SO<sub>3</sub><sup>-</sup> film between two gold contacts.

At the maximum of the semi-circle in the Z'' versus Z' response,

$$C = 1/2\pi fZ' \quad (3)$$

where  $C$  is the capacitance of the film,  $f$  is the frequency and  $Z'$  the real component of impedance. Capacitance is also given by:

$C = A\epsilon_r\epsilon_0 / d$  (4), where  $A$  and  $d$  are the surface area and thickness of the film respectively.

$$\epsilon_r = d/A2\pi fZ'\epsilon_0 \quad (5)$$

By substituting equation (5) in equation (2),

$$\log(9/16A\pi fZ'L^2) + \log(\mu_{eff}) = \text{y-axis intercept } (\log j) \quad (6)$$

The  $Z'$  value was  $1.14 \times 10^{-6} \Omega$ , frequency at the maximum of the semi-circle was 4738 Hz, thickness of the film ( $L$  or  $d$ ) was  $620 \times 10^{-7}$  cm, and by solving equation (6) we deduced the charge carrier mobility to be  $1.6 \times 10^{-8} \text{ cm}^2 \text{ V}^{-1} \text{ s}^{-1}$ .

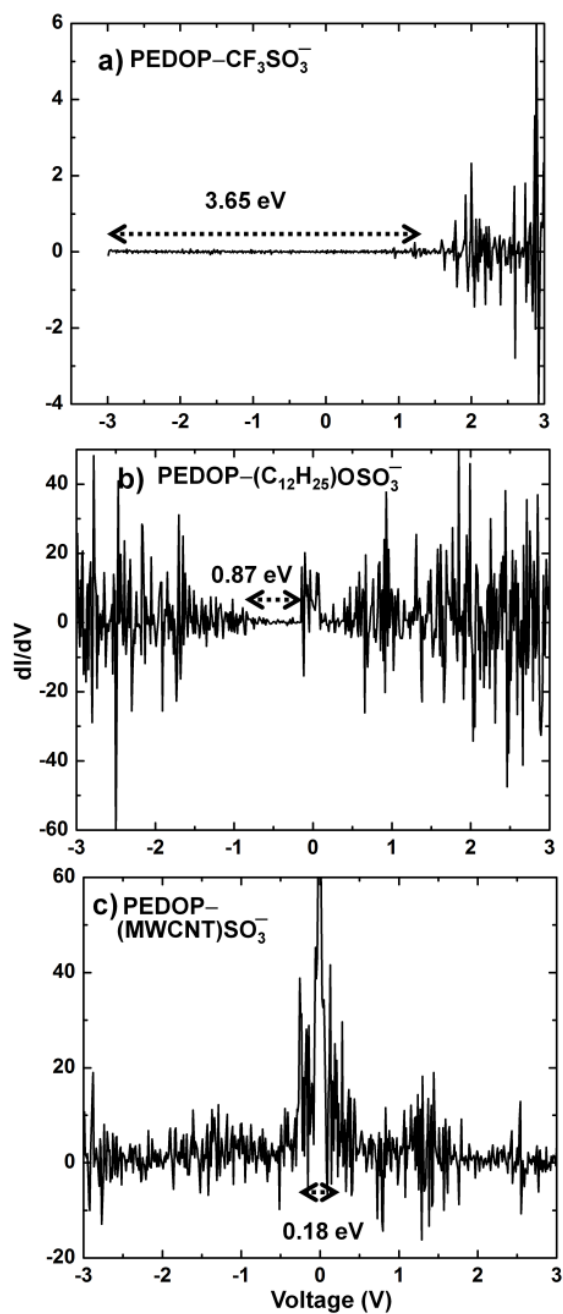

Figure S4  $dI/dV$  versus applied bias (V) plots of (a) PEDOP- $\text{CF}_3\text{SO}_3^-$ , (b) PEDOP- $(\text{C}_{12}\text{H}_{25})\text{OSO}_3^-$  and (c) PEDOP- $(\text{MWCNT})\text{SO}_3^-$  films derived from the point contact I-V curves averaged over 15 spots (inclusive of both bright and dark ones) in the current images shown in Figure 5.

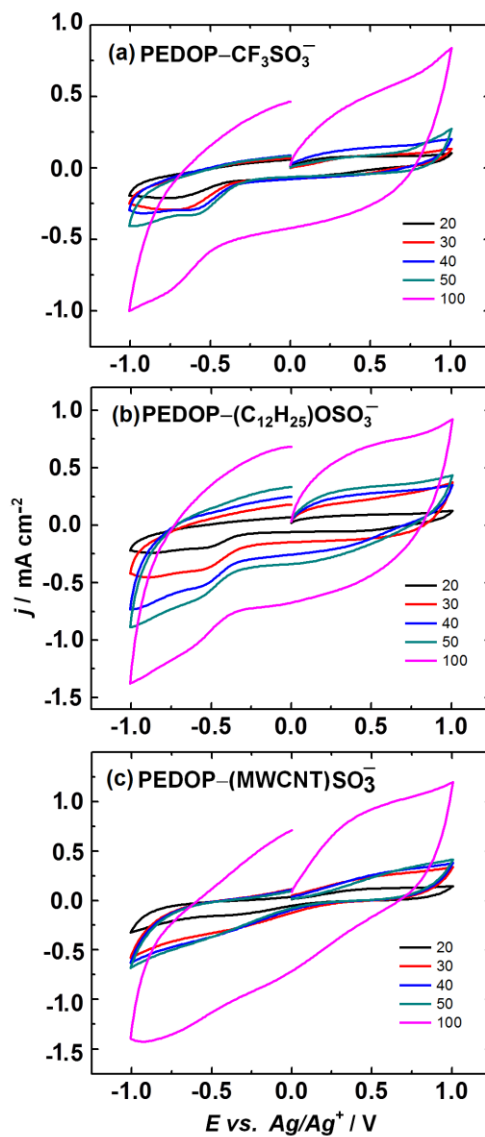

Figure S5 Cyclic voltammograms of (a) PEDOP- $\text{CF}_3\text{SO}_3^-$ , (b) PEDOP- $(\text{C}_{12}\text{H}_{25})\text{OSO}_3^-$  and (c) PEDOP- $(\text{MWCNT})\text{SO}_3^-$  films recorded in a 0.5 M  $\text{LiCF}_3\text{SO}_3/\text{PC}$  electrolyte at scan speeds of 20, 30 40, 50 and 100  $\text{mV s}^{-1}$ . The CV curve acquires a capacitive character at high scan rates (especially 100  $\text{mV s}^{-1}$ ) for all the three films.
